# Supplementary material for: Thioether-functionalized picolinium ionic liquids: synthesis, physical properties and computational studies
Source: Royal Society of Chemistry journal article supplement (doi:10.1039/c6nj02451c), 2017-01-01
Supplement: c6nj02451c1.pdf [file c6nj02451c1.pdf]

## Electronic Supplementary Information

### **Thioether-functionalized picolinium ionic liquids: Synthesis, physical properties and computational studies**

Aaron S. Thigpen,<sup>a</sup> Stephen T. Nestor,<sup>b</sup> Richard A. O'Brien,<sup>c</sup> Samuel Minkowicz,<sup>b</sup> Yinghong Sheng,<sup>b</sup> James H. Davis, Jr.,<sup>c</sup> Kevin N. West\*<sup>a</sup> and Arsalan Mirjafari\*<sup>b</sup>

<sup>a</sup>*Department of Chemical and Biomolecular Engineering, University of South Alabama, Mobile, Alabama 36688, USA, Email: kevinwest@southalabama.edu*

<sup>b</sup>*Department of Chemistry and Physics, Florida Gulf Coast University, Fort Myers, Florida 33965, USA, Email: amirjafari@fgcu.edu*

<sup>c</sup>*Department of Chemistry, University of South Alabama, Mobile, Alabama 36688, USA*

## 1. NMR Data of Products

IL 1:  $^1\text{H}$  NMR ( $\text{CDCl}_3$ , 400 MHz):  $\delta_{\text{H}}$  8.59 (s, 2H); 8.22 (d,  $J = 8.0$  Hz, 1H); 7.86 (t,  $J = 6.3$  Hz, 1H); 4.63 (t,  $J = 7.4$  Hz, 2H); 2.53 (s, 3H); 2.49 (t,  $J = 6.8$  Hz, 2H); 2.43 (t,  $J = 6.9$  Hz, 2H); 2.23 (m, 2H); 1.51 (m, 2H); 0.91 (t,  $J = 7.4$  Hz, 3H);  $^{13}\text{C}$  NMR ( $\text{CDCl}_3$ , 100 MHz):  $\delta_{\text{C}}$  146.2; 143.8; 141.5; 140.34; 127.9; 123.0; 120.9; 118.3; 115.8; 60.4; 33.7; 30.4; 27.6; 22.5; 18.2; 13.2; MS (EI):  $m/z$  212.49 (M+2); 211.49 (M+1); 210.49 (M, calcd. 210.13).

IL 2:  $^1\text{H}$  NMR ( $\text{CDCl}_3$ , 300 MHz):  $\delta_{\text{H}}$  8.61 (d,  $J = 6.6$  Hz, 2H); 7.78 (d,  $J = 6.6$  Hz, 2H); 4.62 (t,  $J = 7.1$  Hz, 2H); 2.64 (s, 3H); 2.47 (m, 4H); 2.23 (m, 2H); 1.55 (m, 2H); 0.93 (t,  $J = 7.4$  Hz, 3H);  $^{13}\text{C}$  NMR ( $\text{CDCl}_3$ , 75 MHz):  $\delta_{\text{C}}$  160.2; 143.7; 129.4; 126.4; 122.1; 117.9; 113.6; 60.0; 34.1; 30.5; 27.9; 22.9; 22.4; 13.5; MS (EI):  $m/z$  212.32 (M+2); 211.32 (M+1); 210.32 (M, calcd. 210.13).

IL 3:  $^1\text{H}$  NMR ( $\text{CDCl}_3$ , 300 MHz):  $\delta_{\text{H}}$  8.56 (s, 2H); 8.20 (d,  $J = 8.0$  Hz, 1H); 7.86 (t,  $J = 7.1$  Hz, 1H); 4.63 (t,  $J = 7.1$  Hz, 2H); 2.53 (s, 3H); 2.43-2.47 (m, 4H); 2.21 (m, 2H); 1.48 (m, 2H); 1.35 (m, 4H); 0.80 (t,  $J = 7.4$  Hz, 3H);  $^{13}\text{C}$  NMR ( $\text{CDCl}_3$ , 75 MHz):  $\delta_{\text{C}}$  146.5; 144.1; 141.1; 140.6; 128.2; 122.1; 117.8; 113.6; 60.0; 31.8; 31.6; 30.7; 30.4; 27.9; 22.4; 18.6; 13.5; MS (EI):  $m/z$  226.49 (M+2); 225.49 (M+1); 224.49 (M, calcd. 224.15).

IL 4:  $^1\text{H}$  NMR ( $\text{CDCl}_3$ , 300 MHz):  $\delta_{\text{H}}$  8.57 (s, 2H); 8.21 (d,  $J = 8.1$  Hz, 1H); 7.86 (t,  $J = 7.4$  Hz, 1H); 4.63 (t,  $J = 7.1$  Hz, 2H); 2.53 (s, 3H); 2.46 (m, 4H); 2.21 (m, 2H); 1.48 (m, 2H); 1.35 (m, 6H); 0.83 (t,  $J = 7.4$  Hz, 3H);  $^{13}\text{C}$  NMR ( $\text{CDCl}_3$ , 75 MHz):  $\delta_{\text{C}}$  146.5; 144.1; 141.8; 140.6; 128.2; 126.3; 122.1; 117.8; 113.6; 60.0; 32.2; 31.8; 30.6; 29.1; 28.8; 27.9; 22.8; 18.6; 14.2; MS (EI):  $m/z$  240.42 (M+2); 239.42 (M+1); 238.42 (M, calcd. 238.16).

IL 5:  $^1\text{H}$  NMR ( $\text{CDCl}_3$ , 300 MHz): 8.57 (d,  $J = 6.8$  Hz, 2H); 7.75 (d,  $J = 6.3$  Hz, 2H); 4.63 (t,  $J = 7.1$  Hz, 2H); 2.61 (s, 3H); 2.40-2.46 (m, 4H); 2.20 (m, 2H); 1.48 (m, 2H); 1.24 (m, 6H); 0.81 (t,  $J = 7.4$  Hz, 3H);  $^{13}\text{C}$  NMR ( $\text{CDCl}_3$ , 75 MHz):  $\delta_{\text{C}}$  160.6; 143.7; 129.4; 126.6; 122.0; 117.8; 113.6; 60.0; 32.1; 31.1; 30.4; 29.2; 27.9; 22.8; 22.3; 14.2; MS (EI):  $m/z$  240.77 (M+2); 239.77 (M+1); 238.77 (M, calcd. 238.16).

IL 6:  $^1\text{H}$  NMR ( $\text{CDCl}_3$ , 300 MHz):  $\delta_{\text{H}}$  8.55 (s, 2H); 8.20 (d, 1H); 7.85 (t, 1H); 4.61 (t,  $J = 7.1$  Hz, 2H); 2.52 (s, 3H); 2.44 (m, 4H); 2.20 (m, 2H); 1.46 (m, 2H); 1.18-1.30 (m, 8H); 0.79 (t,  $J = 6.8$  Hz, 3H);  $^{13}\text{C}$  NMR ( $\text{CDCl}_3$ , 75 MHz):  $\delta_{\text{C}}$  146.5; 144.0; 141.8; 140.6; 128.1; 126.3; 122.0; 117.8; 113.5; 60.6; 32.1; 31.4; 30.6; 29.5; 28.5; 27.9; 22.6; 18.5; 14.1;  $m/z$  254.36 (M+2); 253.37 (M+1); 252.37 (M, calcd. 252.15).

IL 7:  $^1\text{H}$  NMR ( $\text{CDCl}_3$ , 300 MHz): 8.57 (d,  $J = 6.6$  Hz, 2H); 7.75 (d,  $J = 6.3$  Hz, 2H); 4.59 (t,  $J = 7.1$  Hz, 2H); 2.61 (s, 3H); 2.40-2.46 (m, 4H); 2.21 (m, 2H); 1.48 (m, 2H); 1.19-1.29 (m, 8H); 0.81 (t,  $J = 6.6$  Hz, 3H);  $^{13}\text{C}$  NMR ( $\text{CDCl}_3$ , 75 MHz):  $\delta_{\text{C}}$  160.2; 143.7; 129.4; 126.4; 122.1; 117.9; 113.5; 60.0; 32.1; 31.2; 30.6; 29.5; 28.6; 27.9; 22.8; 22.3; 14.2; MS (EI):  $m/z$  254.90 (M+2); 253.90 (M+1); 252.90 (M, calcd. 252.15).

IL 8:  $^1\text{H}$  NMR ( $\text{CDCl}_3$ , 300 MHz):  $\delta_{\text{H}}$  8.55 (s, 2H); 8.20 (d,  $J = 7.9$  Hz, 1H); 7.84 (t,  $J = 6.6$  Hz, 1H); 4.61 (t,  $J = 7.1$  Hz, 2H); 2.51 (s, 3H); 2.44 (m, 4H); 2.19 (m, 2H); 1.46 (m, 2H); 1.17-1.31 (m, 10H); 0.79 (t,  $J = 6.8$  Hz, 3H);  $^{13}\text{C}$  NMR ( $\text{CDCl}_3$ , 75 MHz):  $\delta_{\text{C}}$  146.5; 144.1; 141.8; 140.6; 128.1; 126.3; 122.0; 117.8; 113.5; 60.6; 32.1; 31.8; 31.7; 30.6; 29.5; 28.9; 27.9; 22.6; 18.5; 14.1;  $m/z$  268.12 (M+2); 267.12 (M+1); 266.12 (M, calcd. 266.19).

IL 9:  $^1\text{H}$  NMR ( $\text{CDCl}_3$ , 300 MHz): 8.57 (d,  $J = 6.8$  Hz, 2H); 7.75 (d,  $J = 6.3$  Hz, 2H); 4.58 (t,  $J = 7.1$  Hz, 2H); 2.60 (s, 3H); 2.42 (m, 4H); 2.20 (m, 2H); 1.45 (m, 2H); 1.18-1.29 (m, 10H); 0.80 (t,  $J = 6.6$  Hz, 3H);  $^{13}\text{C}$  NMR ( $\text{CDCl}_3$ , 75 MHz):  $\delta_{\text{C}}$  160.2; 143.7; 129.4; 126.3; 122.1; 117.8; 113.6; 60.0; 32.1; 31.8; 30.5; 29.6; 29.5; 29.0; 28.9; 27.7; 22.3; 14.2; MS (EI):  $m/z$  268.47 (M+2); 267.47 (M+1); 266.47 (M, calcd. 266.19).

IL 10:  $^1\text{H}$  NMR ( $\text{CDCl}_3$ , 300 MHz):  $\delta_{\text{H}}$  8.56 (s, 2H); 8.21 (d,  $J = 8.2$  Hz, 1H); 7.86 (t,  $J = 6.6$  Hz, 1H); 4.62 (t,  $J = 7.1$  Hz, 2H); 2.53 (s, 3H); 2.45 (m, 4H); 2.21 (m, 2H); 1.48 (m, 2H); 1.19-1.31 (m, 12H); 0.80 (t,  $J = 6.8$  Hz, 3H);  $^{13}\text{C}$  NMR ( $\text{CDCl}_3$ , 75 MHz):  $\delta_{\text{C}}$  146.5; 144.1; 141.8; 140.6; 126.3; 122.0; 117.8; 113.5; 60.6; 32.1; 31.8; 30.6; 29.5; 28.9; 29.3; 2.14; 28.9; 25.6; 22.7; 18.5; 14.2;  $m/z$  282.64 (M+2); 281.64 (M+1); 280.64 (M, calcd. 280.21).

IL 11:  $^1\text{H}$  NMR ( $\text{CDCl}_3$ , 300 MHz):  $\delta_{\text{H}}$  8.57 (s,  $J = 6.3$  Hz, 2H); 7.75 (d,  $J = 6.3$  Hz, 2H); 4.60 (t,  $J = 7.1$  Hz, 2H); 2.61 (s, 3H); 2.40-2.48 (m, 4H); 2.23 (m, 2H); 1.48 (m, 2H); 1.18-1.30 (m, 12H); 0.80 (t,  $J = 6.6$  Hz, 3H);  $^{13}\text{C}$  NMR ( $\text{CDCl}_3$ , 75 MHz):  $\delta_{\text{C}}$  160.2; 143.7; 129.4; 122.1; 117.8; 115.6; 60.0; 32.2; 32.1; 30.4; 29.7; 29.6; 29.4; 29.3; 28.9; 27.9; 22.8; 22.3; 14.2;  $m/z$  282.08 (M+2); 281.08 (M+1); 280.08 (M, calcd. 280.21).

IL 12:  $^1\text{H}$  NMR ( $\text{CDCl}_3$ , 300 MHz):  $\delta_{\text{H}}$  8.57 (d,  $J = 6.3$  Hz, 2H); 7.75 (d,  $J = 6.3$  Hz, 2H); 4.59 (t,  $J = 7.1$  Hz, 2H); 2.61 (s, 3H); 2.40-2.46 (m, 4H); 2.20 (m, 2H); 1.47 (m, 2H); 1.19-1.31 (m, 14H); 0.80 (t,  $J = 6.3$  Hz, 3H);  $^{13}\text{C}$  NMR ( $\text{CDCl}_3$ , 75 MHz):  $\delta_{\text{C}}$  160.2; 143.7; 129.4;

122.1; 117.8; 113.6; 60.0; 32.2; 32.0; 30.5; 29.7; 29.6; 29.4; 29.4; 29.0; 27.9; 22.8; 22.3; 14.2;  $m/z$  296.14 (M+2); 295.14 (M+1); 294.14 (M, calcd. 294.22).

IL 13:  $^1\text{H}$  NMR ( $\text{CDCl}_3$ , 300 MHz):  $\delta_{\text{H}}$  8.57 (d,  $J = 6.0$  Hz, 2H); 7.75 (d,  $J = 6.3$  Hz, 2H); 4.59 (t,  $J = 7.1$  Hz, 2H); 2.61 (s, 3H); 2.40-2.47 (m, 4H); 2.20 (m, 2H); 1.47 (m, 2H); 1.18-1.32 (m, 20H); 0.80 (t,  $J = 6.3$  Hz, 3H);  $^{13}\text{C}$  NMR ( $\text{CDCl}_3$ , 75 MHz):  $\delta_{\text{C}}$  160.2; 143.9; 129.4; 122.1; 117.8; 113.6; 60.0; 32.2; 32.1; 30.5; 29.8; 29.7; 29.7; 29.6; 29.5; 29.4; 29.0; 28.8; 27.9; 25.6; 22.8; 22.3; 14.2;  $m/z$  338.54 (M+2); 337.54 (M+1); 336.54 (M, calcd. 336.27).

IL 14:  $^1\text{H}$  NMR ( $\text{CDCl}_3$ , 400 MHz):  $\delta_{\text{H}}$  8.58 (s, 2H); 8.21 (d,  $J = 7.6$  Hz, 2H); 7.88 (t,  $J = 7.4$  Hz, 1H); 4.67 (t,  $J = 7.1$  Hz, 2H); 2.56 (s, 3H); 2.43-2.49 (m, 4H); 2.26 (m, 2H); 1.45-1.56 (m, 2H); 1.18-1.36 (m, 24H); 0.83 (t,  $J = 6.8$  Hz, 3H);  $^{13}\text{C}$  NMR ( $\text{CDCl}_3$ , 100 MHz):  $\delta_{\text{C}}$  146.4; 144.2; 141.9; 140.6; 128.1; 126.2; 122.1; 117.8; 113.6; 60.7; 32.1; 29.8; 29.8; 29.7; 29.6; 29.6; 29.5; 29.5; 29.4; 29.3; 22.8; 18.7; 14.3;  $m/z$  366.84 (M+2); 365.84 (M+1); 364.84 (M, calcd. 364.30).

IL 15:  $^1\text{H}$  NMR ( $\text{CDCl}_3$ , 400 MHz):  $\delta_{\text{H}}$  8.57 (d,  $J = 6.6$  Hz, 2H); 7.74 (d,  $J = 6.3$  Hz, 2H); 4.59 (t,  $J = 7.1$  Hz, 2H); 2.61 (s, 3H); 2.40-2.45 (m, 4H); 2.20 (m, 2H); 1.47 (m, 2H); 1.18-1.27 (m, 24H); 0.80 (t,  $J = 7.1$  Hz, 3H);  $^{13}\text{C}$  NMR ( $\text{CDCl}_3$ , 100 MHz):  $\delta_{\text{C}}$  160.2; 143.5; 129.4; 122.0; 117.8; 113.4; 60.0; 32.2; 32.0; 30.5; 29.8; 29.7; 29.6; 29.5; 29.4; 29.0; 28.8; 27.9; 22.8; 22.3; 14.2;  $m/z$  366.27 (M+2); 365.27 (M+1); 364.27 (M, calcd. 364.30).

IL 16:  $^1\text{H}$  NMR ( $\text{CDCl}_3$ , 300 MHz):  $\delta_{\text{H}}$  8.55 (s, 2H); 8.20 (d,  $J = 8.0$  Hz, 1H); 7.84 (t,  $J = 6.6$  Hz, 1H); 4.60 (t,  $J = 7.1$  Hz, 2H); 2.60 (m, 1H); 2.54 (s, 3H); 2.46 (t,  $J = 6.8$  Hz, 2H); 2.19 (m, 2H); 1.48 (m, 2H); 1.14 (t,  $J = 6.6$  Hz, 3H); 0.86 (t,  $J = 7.1$  Hz, 3H);  $^{13}\text{C}$  NMR ( $\text{CDCl}_3$ , 75 MHz):  $\delta_{\text{C}}$  146.8; 144.4; 142.2; 140.9; 128.5; 122.4; 118.2; 113.9; 61.1; 50.56; 42.4; 31.3; 30.0; 26.5; 21.1; 18.9; 11.7; MS (EI):  $m/z$  226.49 (M+2); 225.49 (M+1); 224.49 (M, calcd. 224.15).

IL 17:  $^1\text{H}$  NMR ( $\text{CDCl}_3$ , 300 MHz):  $\delta_{\text{H}}$  8.56 (s, 2H); 8.20 (d,  $J = 8.0$  Hz, 1H); 7.85 (t,  $J = 6.6$  Hz, 1H); 4.61 (t,  $J = 7.1$  Hz, 2H); 2.51 (s, 3H); 2.48 (t,  $J = 6.6$  Hz, 2H); 2.21 (m, 2H); 1.84 (m, 3H); 1.67 (m, 2H); 1.51 (m, 2H); 1.20 (m, 5H);  $^{13}\text{C}$  NMR ( $\text{CDCl}_3$ , 75 MHz):  $\delta_{\text{C}}$  146.2; 144.5; 141.4; 140.6; 128.1; 126.3; 122.1; 117.8; 113.5; 60.7; 44.0; 43.5; 33.7; 31.0; 26.3; 26.0; 25.8; 18.8; 18.3;  $m/z$  252.42 (M+2); 252.42 (M+1); 250.42 (M, calcd. 250.16).

IL 18:  $^1\text{H}$  NMR ( $\text{CDCl}_3$ , 300 MHz):  $\delta_{\text{H}}$  8.55 (s, 2H); 8.20 (d,  $J = 8.2$  Hz, 1H); 7.84 (t,  $J = 6.6$  Hz, 1H); 4.60 (t,  $J = 7.1$  Hz, 2H); 2.51 (s, 3H); 2.40-2.46 (m, 4H); 2.20 (m, 2H); 1.55 (m, 1H); 1.35 (m, 2H); 0.80 (d,  $J = 6.5$  Hz, 6H);  $^{13}\text{C}$  NMR ( $\text{CDCl}_3$ , 75 MHz):  $\delta_{\text{C}}$  146.5; 144.9; 142.7; 141.0; 128.6; 122.4; 118.2; 113.9; 61.0; 38.8; 31.2; 30.8; 28.7; 27.9; 22.9; 22.0; 19.6; 18.2; MS (EI):  $m/z$  240.69 (M+2); 239.69 (M+1); 238.69 (M, calcd. 238.16).

## 2. Heat Capacity

**Table S1.** Heat capacity modeling characterization of new and reference ionic liquids

| IL                                                                     | Model | Std. Dev. | A        | B       | C/D        |
|------------------------------------------------------------------------|-------|-----------|----------|---------|------------|
| 1                                                                      | 1     | 0.00120   | 70.1766  | 0.07071 | 0.00004192 |
| 2                                                                      | 2     | 0.00191   | 68.7692  | 0.09556 | -421312.62 |
| 3                                                                      | 3     | 0.00079   | 71.3009  | 0.09708 | --         |
| 4                                                                      | 2     | 0.00075   | 75.0392  | 0.10132 | -121967.07 |
| 5                                                                      | 2     | 0.0009    | 77.3049  | 0.10054 | -217300.42 |
| 6                                                                      | 1     | 0.00102   | 80.5741  | 0.07361 | 6.7405E-05 |
| 7                                                                      | 3     | 0.00082   | 69.8368  | 0.11111 | --         |
| 8                                                                      | 1     | 0.00115   | 92.2788  | 0.01536 | 0.00016055 |
| 9                                                                      | 1     | 0.0008    | 81.4609  | 0.07926 | 5.9937E-05 |
| 10                                                                     | 2     | 0.00059   | 39.6100  | 0.25503 | 1231835.21 |
| 11                                                                     | 2     | 0.00052   | 84.2877  | 0.1194  | -133088.04 |
| 12                                                                     | 3     | 0.0009    | 82.6283  | 0.13135 | --         |
| 13                                                                     | 1     | 0.00033   | 218.522  | -0.5941 | 0.001054   |
| 14                                                                     | 1     | 0.00064   | 133.555  | -0.1892 | 0.00039886 |
| 15                                                                     | 1     | 0.00192   | 300.096  | -1.1281 | 0.0019142  |
| [moleylim][NTf <sub>2</sub> ] <sup>a</sup>                             | 3     | 0.0010    | 87.8716  | 0.15987 | --         |
| [eliadylmim][NTf <sub>2</sub> ] <sup>a</sup>                           | 1     | 0.0006    | 290.2562 | -0.9223 | 0.001696   |
| [mC <sub>18</sub> (S <sub>4</sub> )im][NTf <sub>2</sub> ] <sup>b</sup> | 1     | 0.0005    | 159.5506 | -0.2419 | 0.000513   |
| [mC <sub>20</sub> (S <sub>4</sub> )im][NTf <sub>2</sub> ] <sup>b</sup> | 1     | 0.0018    | 370.0835 | -1.4139 | 0.002518   |

<sup>a</sup>Synthesis of the lipidic ionic liquids was reported in Ref. 20; <sup>b</sup>Synthesis of the thiolipidic ionic liquids was reported in Ref. 15e.
